# Supplementary material
Source: PubMed Central journal article supplement (PMC9210004)

**Supplemental Figure S1a. Forest plot of odds ratio between children with ASD and obesity and control children with obesity (measured height and weight)**

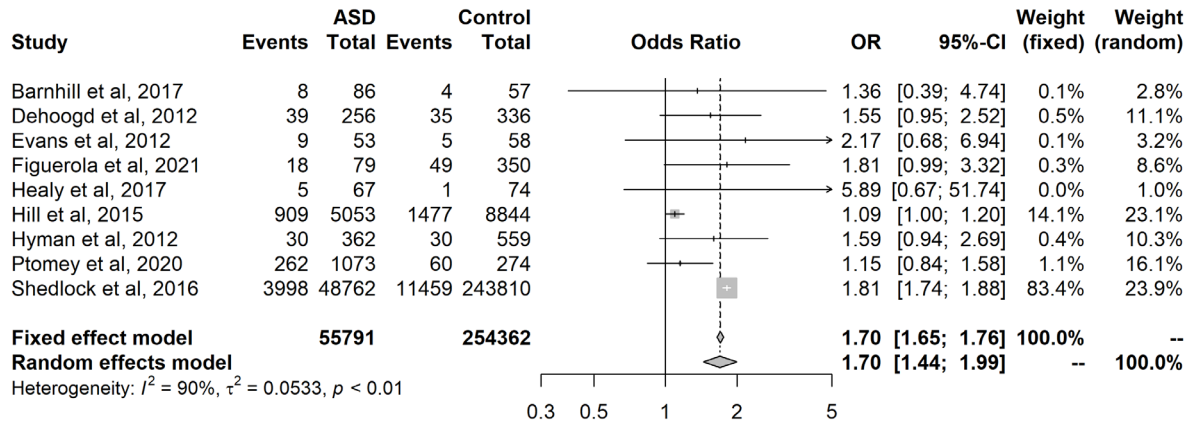

**Supplemental Figure S1b. Forest plot of odds ratio between children with ASD and obesity and control children with obesity (parent reported height and weight)**

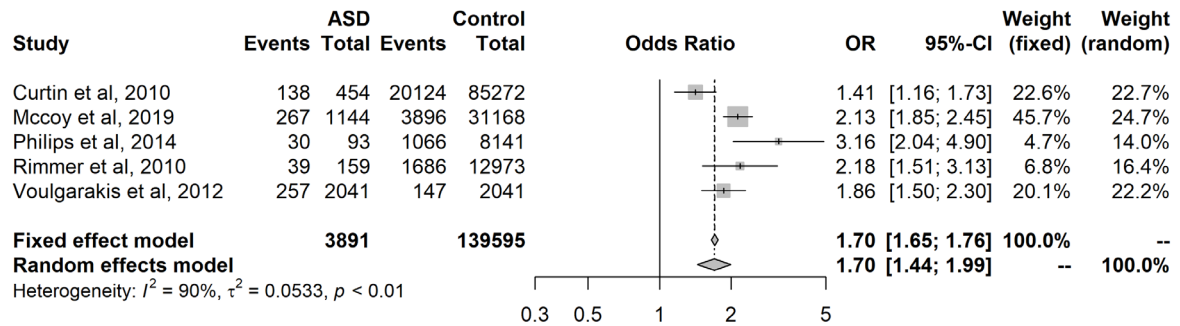

Supplement: ofa-0015-0305-s01.pdf [file ofa-0015-0305-s01.pdf]
