# Supplementary material
Source: PubMed Central journal article supplement (PMC9210004)

**Supplemental figure 2a. Forest plot of proportion of children with obesity in ASD populations (measured height and weight)**

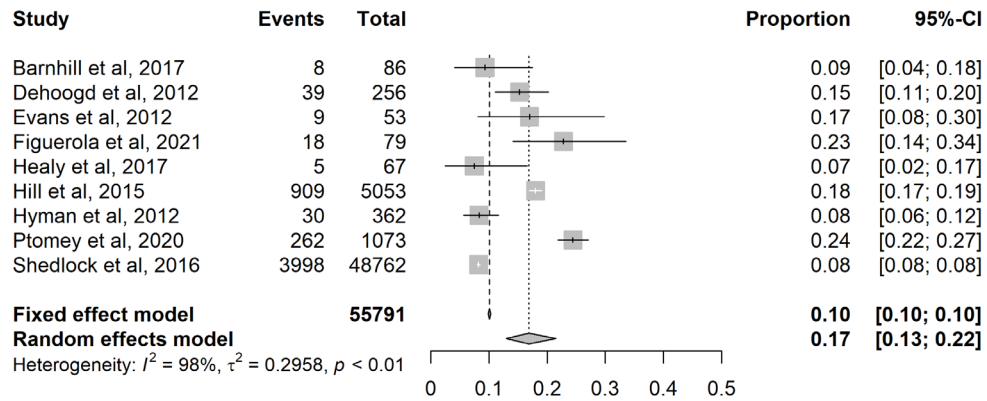

**Supplemental figure 2b. Forest plot of proportion of children with obesity in ASD populations (parent reported height and weight)**

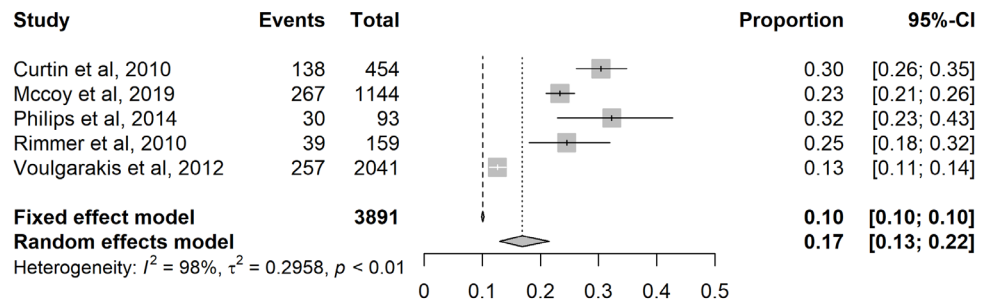

Supplement: ofa-0015-0305-s02.pdf [file ofa-0015-0305-s02.pdf]
