# Supplementary material
Source: PubMed Central journal article supplement (PMC9210004)

**Supplemental figure 3a. Forest plot of the relative risk of obesity among children with ASD compared with children without ASD (measured height and weight)**

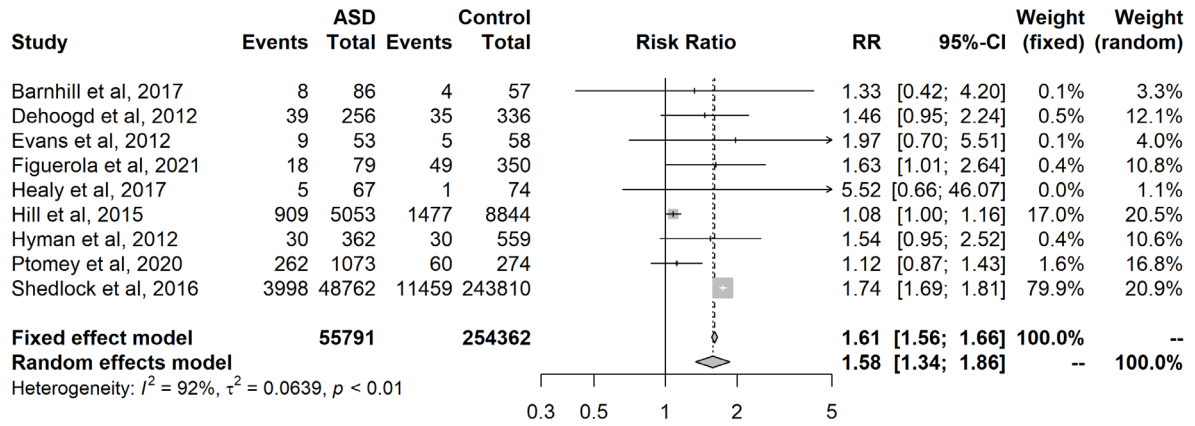

**Supplemental figure 3b. Forest plot of the relative risk of obesity among children with ASD compared with children without ASD (parent reported height/weight)**

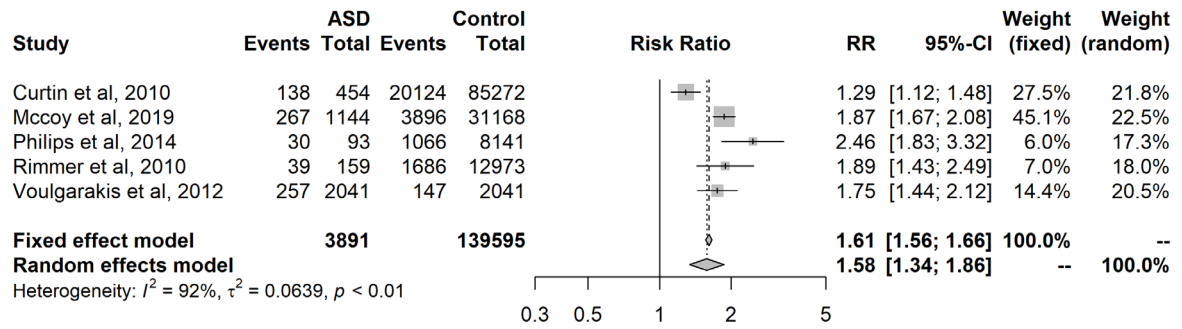

Supplement: ofa-0015-0305-s03.pdf [file ofa-0015-0305-s03.pdf]
