# Supplementary material
Source: PubMed Central journal article supplement (PMC9210004)

Supplemental Figure S4. Funnel plot

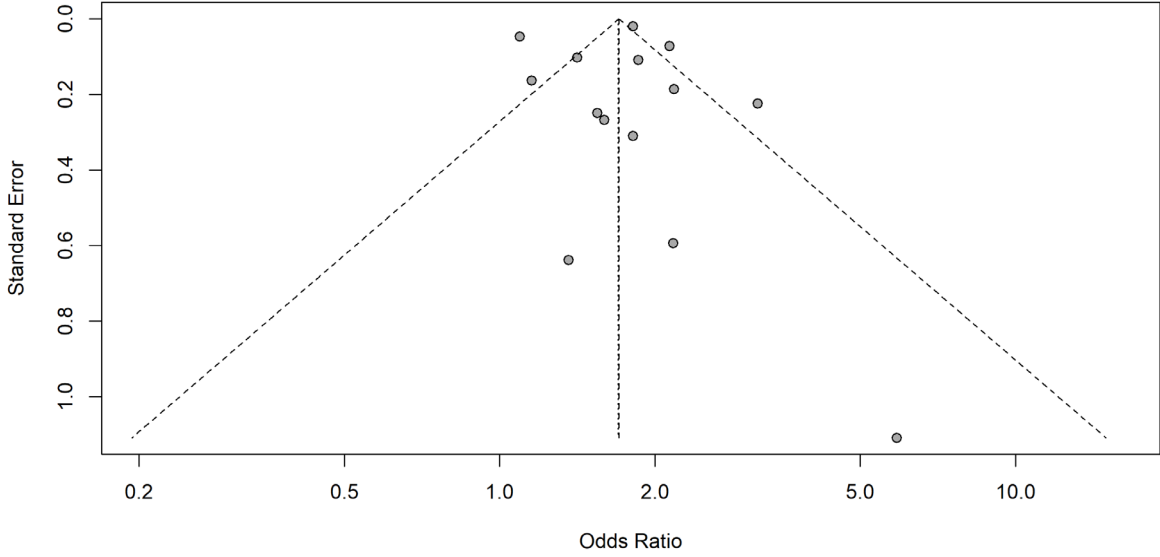

Supplement: ofa-0015-0305-s04.pdf [file ofa-0015-0305-s04.pdf]
